# Supplementary material for: Distinguishing Tumor Admixed in a Radiation Necrosis (RN) Background: 1H and 2H MR With a Novel Mouse Brain-Tumor/RN Model
Source: PubMed Central journal article supplement (PMC9196939; doi:10.3389/fonc.2022.885480), 2022-05-30
Supplement: Table_1.pdf [file Table_1.pdf]

**Supplemental Table.**

Estimates and uncertainties of resonance frequencies, amplitudes, and linewidths derived from decay-rate constants ( $R2^*$ ), for the spectra in Figure 8 are summarized in Table S1 below.

| <b>Control</b>         | <b>Lac</b>  |           | <b>Glx</b>  |           | <b>Glc</b>  |           | <b>HOD</b>  |           |
|------------------------|-------------|-----------|-------------|-----------|-------------|-----------|-------------|-----------|
|                        | <b>Mean</b> | <b>SD</b> | <b>Mean</b> | <b>SD</b> | <b>Mean</b> | <b>SD</b> | <b>Mean</b> | <b>SD</b> |
| <b>Frequency (ppm)</b> | 1.36        | 0.03      | 2.37        | 0.02      | 3.85        | 0.02      | 4.71        | 0.01      |
| <b>Linewidth (Hz)</b>  | 11.7        | 3.4       | 12.6        | 3.6       | 17.1        | 2.5       | 19.6        | 1.7       |
| <b>Amplitude</b>       | 109         | 38        | 187         | 40        | 411         | 44        | 973         | 39        |

| <b>Tumor</b>           | <b>Lac</b>  |           | <b>Glx</b>  |           | <b>Glc</b>  |           | <b>HOD</b>  |           |
|------------------------|-------------|-----------|-------------|-----------|-------------|-----------|-------------|-----------|
|                        | <b>Mean</b> | <b>SD</b> | <b>Mean</b> | <b>SD</b> | <b>Mean</b> | <b>SD</b> | <b>Mean</b> | <b>SD</b> |
| <b>Frequency (ppm)</b> | 1.33        | 0.02      | 2.39        | 0.05      | 3.76        | 0.01      | 4.72        | 0.01      |
| <b>Linewidth (Hz)</b>  | 13.3        | 2.9       | 12.4        | 8.9       | 24.4        | 3.5       | 21.2        | 1.2       |
| <b>Amplitude</b>       | 368         | 31        | 58          | 20        | 752         | 44        | 1318        | 38        |

| <b>Radiation Necrosis</b> | <b>Lac</b>  |           | <b>Glx</b>  |           | <b>Glc</b>  |           | <b>HOD</b>  |           |
|---------------------------|-------------|-----------|-------------|-----------|-------------|-----------|-------------|-----------|
|                           | <b>Mean</b> | <b>SD</b> | <b>Mean</b> | <b>SD</b> | <b>Mean</b> | <b>SD</b> | <b>Mean</b> | <b>SD</b> |
| <b>Frequency (ppm)</b>    | 1.32        | 0.03      | 2.36        | 0.03      | 3.81        | 0.02      | 4.70        | 0.01      |
| <b>Linewidth (Hz)</b>     | 10.6        | 5.3       | 13.1        | 5.4       | 20.6        | 4.1       | 18.5        | 1.3       |
| <b>Amplitude</b>          | 111         | 24        | 123         | 28        | 385         | 34        | 858         | 31        |
